# Supplementary material for: Farm Animal Veterinarians’ Knowledge and Attitudes toward Antimicrobial Resistance and Antimicrobial Use in the Republic of Serbia
Source: MDPI journal article supplement (doi:10.3390/antibiotics11010064), 2022-01-05
Supplement: s1 [file s1]

**QUESTIONNAIRE ON FARM ANIMAL VETERINARIANS'  
KNOWLEDGE AND ATTITUDES  
TOWARDS ANTIMICROBIAL RESISTANCE AND ANTIMICROBIAL USE**

**I Sociodemographic data**

1. Year of birth? (write) \_\_\_\_\_
  
2. Gender (circle): a) female  
b) male
  
3. Do you work in (circle):  
a) a state institution  
b) a private institution
  
4. Your highest level of education (circle):  
a) Doctor of Veterinary Medicine  
b) Masters of Veterinary Medicine  
c) Doctor of Medical Sciences - Veterinary Medicine  
d) Doctor of Veterinary Medicine - Specialist
  
5. Number of years you worked in practice (circle):  
a) 0 - 5  
b) 6 - 15  
c) > 15
  
6. What is the average number of patients you examine on a monthly basis? (write): \_\_\_\_\_

## II Significance of antimicrobial resistance

1. In the last three years, have you attended any education on the rational use of antibiotics or antibacterial resistance? (circle):

a) Yes

b) No

c) I educated myself on antimicrobial resistance using available scientific sources of information

d) I do not remember

2. Do you use domestic or foreign scientific guidelines when prescribing antibiotics in your daily work? (Circle):

Often / moderately / rarely or never / there are no good guidelines

3. Would you like to have more local guidelines for the rational use of antibiotics? (Circle):

Yes / No / I do not know

4. Have you encountered bacterial infections for which most antibiotics have been ineffective in your daily work? (circle):

Daily / Weekly / Monthly / Rarely / Never

5. To what extent do you think these factors influence the development and spread of antibiotic resistance? (Circle):

|                                                       |                                                             |
|-------------------------------------------------------|-------------------------------------------------------------|
| Hygiene on farms                                      | Insignificant / small impact / medium impact / large impact |
| Rational prescribing of antibiotics by a veterinarian | Insignificant / small impact / medium impact / large impact |
| Rational use of antibiotics in farm animals           | Insignificant / small impact / medium impact / large impact |
| Rational use of antibiotics by patients               | Insignificant / small impact / medium impact / large impact |

6. What are the sources of transmission of resistant bacteria to humans (multiple answers):

- a) contact with other people
- b) animal products (milk, meat, eggs)
- c) contact with animals
- d) plants
- e) environment
- f) all of the above

7. Are you familiar with the term Antimicrobial stewardship and its' principles?

YES / NO

**8. Antimicrobial stewardship (AMS) is defined as an ongoing effort by a health service organisation to optimise antimicrobial use among patients 'to improve patient outcomes, ensure cost-effective therapy and reduce adverse sequelae of antimicrobial use (including antimicrobial resistance). Taking this into consideration do you think that Antimicrobial Stewardship Guidelines and Regulations can contribute to (multiple responses):**

- a) responsible prescribing of antibiotics
- b) reducing the occurrence of antibiotic-resistant bacteria in humans
- c) reducing the occurrence of antibiotic-resistant bacteria in animals
- e) it will not significantly change the situation

9. Are you familiar with the listed alternatives to antibiotics? (Circle)

- 1. vaccines
- 2. probiotics
- 3. prebiotics
- 4. synbiotics
- 5. antimicrobial peptides
- 6. phage therapy
- 7. bacteriocins
- 8. phytocomponents
- 9. immunostimulants
- 10. nanoparticles
- 11. feed enzymes

10. What is the level of contribution of the following factors to the resistance of bacteria to antibiotics (circle):

|                                                                            |                     |
|----------------------------------------------------------------------------|---------------------|
| Excessive use of antibiotics                                               | low / medium / high |
| Low doses of antibiotics                                                   | low / medium / high |
| Prescribing antibiotics in therapy without appropriate tests (antibiogram) | low / medium / high |
| Inadequate length of antibiotic therapy (too short or too long)            | low / medium / high |

### III Rational use of antibiotics

1. Do you have regulations for prescribing antibiotics in your practice / on the farm?

YES / NO

2. If you do not have these regulations, do you think they should exist?

YES / NO

3. Do you keep records of the amount of antibiotics used in your practice?

YES / NO

4. Do you routinely conduct an antibiogram in case of antibiotic therapy? Circle:

YES / NO

5. What are the reasons for prescribing antibiotics without a clear indication? Multiple answers:

- a) insufficient education of veterinarians
- b) pressure from the owner of the animal (patient)
- c) prescribing habits
- d) lack of rapid diagnostic tests
- e) financial situation of animal owners / costs of microbiological tests
- f) lack of clear guidelines for some conditions and diseases

6. How often do you prescribe antibiotics for indications outside the instructions for the use of the drug?

often / moderately / rarely or never

## 7. Significance of factors in decision making when prescribing antibiotics

|                                                            |                                                                                |
|------------------------------------------------------------|--------------------------------------------------------------------------------|
| Care for the spread of antimicrobial resistance in humans  | Very significant / Moderately significant / Partly significant / Insignificant |
| Care for the spread of antimicrobial resistance in animals | Very significant / Moderately significant / Partly significant / Insignificant |
| Anamnesis                                                  | Very significant / Moderately significant / Partly significant / Insignificant |
| Clinical signs                                             | Very significant / Moderately significant / Partly significant / Insignificant |
| Availability of antibiotics                                | Very significant / Moderately significant / Partly significant / Insignificant |
| Antibiogram                                                | Very significant / Moderately significant / Partly significant / Insignificant |
| Treatment costs                                            | Very significant / Moderately significant / Partly significant / Insignificant |
| Milk withdrawal period                                     | Very significant / Moderately significant / Partly significant / Insignificant |
| Expectations by animal owners                              | Very significant / Moderately significant / Partly significant / Insignificant |
| Expectations from colleagues                               | Very significant / Moderately significant / Partly significant / Insignificant |
| Good practice guidelines                                   | Very significant / Moderately significant / Partly significant / Insignificant |

## 8. When do you prescribe antibiotics (multiple answers possible):

- a) as metaphylaxis
- b) as prophylaxis
- c) exclusively for therapeutic purposes

## 9. To what extent do you think the use of antibiotics by unqualified persons affects the appearance of resistance?

There is no impact / there is a moderate impact / there is a significant impact

#### IV Knowledge of antimicrobial resistance

1. On the scale shown next to each statement, circle the extent to which you agree with it. One answer per claim.

|    |                                                                                                                                                             | Completely agree | Partially agree | Neither agree nor disagree | Slightly disagree | Do not agree |
|----|-------------------------------------------------------------------------------------------------------------------------------------------------------------|------------------|-----------------|----------------------------|-------------------|--------------|
| 1. | AMR is an important problem in both human and veterinary medicine.                                                                                          | 5                | 4               | 3                          | 2                 | 1            |
| 2. | Bacterial resistance to antibiotics will become a far more significant problem in the clinic in the near future if we do not take appropriate measures now. | 5                | 4               | 3                          | 2                 | 1            |
| 3. | The antibiotics I prescribe contribute to the problem of antimicrobial resistance.                                                                          | 5                | 4               | 3                          | 2                 | 1            |
| 4. | Uncontrolled use of antibiotics in farm animals is an important cause of resistance to bacterial infections in humans.                                      | 5                | 4               | 3                          | 2                 | 1            |
| 5. | There is insufficient information on the direct effect of antibiotic use in animals with the development of antimicrobial resistance in humans.             | 5                | 4               | 3                          | 2                 | 1            |
| 6. | Over-the-counter antibiotics should be prohibited.                                                                                                          | 5                | 4               | 3                          | 2                 | 1            |

|    |                                                                                                 |   |   |   |   |   |
|----|-------------------------------------------------------------------------------------------------|---|---|---|---|---|
| 7. | The problem of antibiotic resistance of bacteria is mainly a problem in hospital settings.      | 5 | 4 | 3 | 2 | 1 |
| 8. | I am open to using alternatives to antibiotics if they are proven to be successful in practice. | 5 | 4 | 3 | 2 | 1 |

### **Cow mastitis antibiotic therapy**

1. Circle the 3 antibiotics that you most often prescribe in the treatment of mastitis in cows:

1. Amoxicillin
2. Ampicillin
3. Ceftriaxone
4. Enrofloxacin
5. Erythromycin
6. Gentamicin
7. Lincomycin
8. Neomycin
9. Penicillin
10. Streptomycin
11. Tetracycline
12. Amoxicillin + Clavulanic acid
13. Novobiocin
14. Trimethoprim + Sulfamethoxazole
15. Cloxacillin

2. When prescribing antibiotics for the treatment of mastitis in cows, I am mostly guided by (circle):

- a) personal professional experience and knowledge of the clinical signs
- b) regulations (domestic and foreign)
- c) exclusively diagnostic analysis (antibiogram)
- d) the duration of the milk withdrawal period
