# Supplementary material for: Farm Animal Veterinarians’ Knowledge and Attitudes toward Antimicrobial Resistance and Antimicrobial Use in the Republic of Serbia
Source: Antibiotics (Basel). 2022 Jan 5;11(1):64. doi: 10.3390/antibiotics11010064 (PMC8773276; doi:10.3390/antibiotics11010064)
Supplement: Supplementary file 1 [file antibiotics-11-00064-s001.zip › antibiotics-1522259-Supplementary File S2.xlsx]

## Sheet: FARM ANIMAL
1. Year of birth	Age	2. Gender:	3. Work place:	4. Highest education degree :	5. Number of years working in practice :	6. Number of patients on a monthly level?:	1. Education on antibiotics use	2. Use of guidelines	3. The existance of local guidelinos	4. Experience with resistant infections	5. Pharm hygiene	5. Rationaly prescribing AB	5. Rationally using AB on farms	6. Resistant bacteria sources (multiple answers)_1:	6. Resistant bacteria sources (multiple answers)_2:	6. Resistant bacteria sources (multiple answers)_3:	6. Resistant bacteria sources (multiple answers)_4:	7. Knowledge on AMS	8. AST guidelines impact on sectors (multiple answers)_1:	8. AST guidelines impact on sectors (multiple answers) _2:	8. AST guidelines impact on sectors (multiple answers) _3:	9. AB alternatives? (multiple answers)_1:	9. AB alternatives? (multiple answers)_2:	9. AB alternatives? (multiple answers)_3:	9. AB alternatives? (multiple answers)_4:	9. AB alternatives? (multiple answers)_5:	9. AB alternatives? (multiple answers)_6:	9. AB alternatives? (multiple answers)_7:	9. AB alternatives? (multiple answers)_8:	9. AB alternatives? (multiple answers)_9:	10. Antibiotic therapy influences on the development of AMR - Excessive use of AB	10. Antibiotic therapy influences on the development of AMR - Low doses of AB	10. Antibiotic therapy influences on the development of AMR - Prescribing ABs withoun antibiogram	10.Antibiotic therapy influences on the development of AMR - Inapropriate duraton of AB treatment	1. Regulations on prescribing ABs	2. The existance of ABs regulations	3. Collecting data on ABs use	4. Reasons for prescribing antibiotics without a clear indication(multiple answers)_1:	4. Reasons for prescribing antibiotics without a clear indication(multiple answers)_2:	4. Reasons for prescribing antibiotics without a clear indication(multiple answers)_3:	4. Reasons for prescribing antibiotics without a clear indication(multiple answers)_4:	4. Reasons for prescribing antibiotics without a clear indication(multiple answers)_5:	5. Prescribing ABs outside the indications?	6. Factors that influence AB prescribing-AMR in humans	6. Factors that influence AB prescribing-AMR in animals	6. Factors that influence AB prescribing-Anamnesis	6. Factors that influence AB prescribing-Clinical symptoms	6.Factors that influence AB prescribing- Availability of ABs	6.Factors that influence AB prescribing-(AST test) Antiobiogram
1981	40	male	state institution	Doctor of Medical Sciences – Veterinary Medicine	> 15	15	yes	rarely	yes	rarely	medium impact	medium impact	medium impact	all of the above				yes	increase responsible prescribing	reduction of resistant bacteria in animals		vaccines									great impact	great impact	great impact	great impact	no	yes	no	Pressure from animal owners	Prescribing habits	The lack of quick diagnostic tests			rarely	slightly important	moderately important	very important	very important	very important	moderately important
1984	37	female	state institution	Doctor of Medical Sciences – Veterinary Medicine	6-15	1	yes	often	yes	monthly	great impact	great impact	great impact	all of the above				yes	increase responsible prescribing	reduction of resistant bacteria in animals		vaccines	probiotics	prebiotics	bacteriocins	immunostimulants	feed enzymes				great impact	great impact	great impact	great impact	yes	yes	yes	Insufficient education of veterinarians	Pressure from animal owners	Prescribing habits	Animal owners’ financial situation/cost of laboratory tests		often	very important	very important	very important	very important	very important	very important
1974	47	male	state institution	Doctor of Veterinary Medicine	> 15	100	yes	often	yes	daily	great impact	great impact	great impact	all of the above				yes	increase responsible prescribing			probiotics	prebiotics	synbiotics	immunostimulants	feed enzymes					great impact	great impact	great impact	great impact	no	yes	yes	Insufficient education of veterinarians					rarely	very important	very important	very important	very important	very important	very important
1983	38	male	private institution	Doctor of Veterinary Medicine - specialist	6-15	500	no	often	yes	rarely	great impact	great impact	great impact	all of the above				yes	reduction of resistant bacteria in humans			vaccines	probiotics	immunostimulants							great impact	small impact	great impact	great impact	no	yes	yes	Insufficient education of veterinarians	Animal owners’ financial situation/cost of laboratory tests				moderately	very important	very important	very important	very important	very important	very important
1979	42	male	private institution	Doctor of Veterinary Medicine	6-15	25	yes	often	yes	rarely	great impact	great impact	great impact	animal products	contact with animals			yes	increase responsible prescribing			prebiotics	synbiotics								great impact	great impact	great impact	great impact	no	yes	yes	Pressure from animal owners	The lack of quick diagnostic tests	The lack of clear guidelines for certain diseases			rarely	very important	very important	very important	very important	very important	very important
1993	28	male	private institution	Doctor of Medical Sciences – Veterinary Medicine	0 - 5	500	yes	moderately	yes	monthly	great impact	great impact	small impact	animal products				yes	increase responsible prescribing	reduction of resistant bacteria in humans	reduction of resistant bacteria in animals	vaccines	probiotics	immunostimulants							great impact	great impact	great impact	great impact	yes	yes	yes	Insufficient education of veterinarians	Pressure from animal owners	Prescribing habits	The lack of quick diagnostic tests	Animal owners’ financial situation/cost of laboratory tests	moderately	slightly important	slightly important	very important	very important	very important	very important
1965	56	male	private institution	Doctor of Veterinary Medicine	> 15	80	yes	moderately	yes	rarely	small impact	medium impact	medium impact	animal products	environment			no	increase responsible prescribing	reduction of resistant bacteria in humans		immunostimulants									great impact	small impact	great impact	great impact	no	yes	no	Pressure from animal owners	The lack of quick diagnostic tests	Animal owners’ financial situation/cost of laboratory tests			moderately	moderately important	slightly important	very important	moderately important	moderately important	very important
1966	55	male	state institution	Doctor of Medical Sciences – Veterinary Medicine	> 15	100	yes	often	yes	rarely	small impact	great impact	great impact	animal products	contact with animals			no	increase responsible prescribing			vaccines	probiotics	immunostimulants	feed enzymes						great impact	great impact	great impact	great impact	no	yes	yes	Insufficient education of veterinarians	Pressure from animal owners	The lack of clear guidelines for certain diseases			moderately	moderately important	very important	very important	very important	not important	very important
1977	44	female	state institution	Doctor of Veterinary Medicine	6-15	3	yes	there are no good guidelines	yes	weekly	medium impact	great impact	great impact	all of the above				yes	reduction of resistant bacteria in humans			vaccines	probiotics	antimicrobial peptides	bacteriocins	immunostimulants	feed enzymes				great impact	medium impact	great impact	great impact	no	yes	no	Animal owners’ financial situation/cost of laboratory tests					moderately	very important	moderately important	slightly important	very important	slightly important	very important
1968	53	male	private institution	Doctor of Veterinary Medicine	> 15	40	yes	often	yes	weekly	medium impact	great impact	great impact	animal products				no	reduction of resistant bacteria in humans	reduction of resistant bacteria in animals		vaccines	probiotics								great impact	small impact	great impact	great impact	no	no	yes	Animal owners’ financial situation/cost of laboratory tests	The lack of clear guidelines for certain diseases				rarely	not important	very important	very important	very important	moderately important	very important
1990	31	male	private institution	Doctor of Veterinary Medicine	6-15	150	yes	moderately	yes	monthly	small impact	great impact	great impact	animal products	plants	environment		yes	increase responsible prescribing	reduction of resistant bacteria in humans	reduction of resistant bacteria in animals	vaccines	probiotics	prebiotics	antimicrobial peptides	immunostimulants	feed enzymes				great impact	great impact	medium impact	great impact	yes	yes	yes	Insufficient education of veterinarians	Prescribing habits	The lack of quick diagnostic tests	Animal owners’ financial situation/cost of laboratory tests		never	very important	very important	very important	very important	moderately important	not important
1987	34	male	private institution	Doctor of Veterinary Medicine	6-15	700	yes	rarely	yes	weekly	small impact	great impact	great impact	animal products				no	increase responsible prescribing			probiotics	prebiotics								great impact	great impact	great impact	great impact	no	yes	no	Insufficient education of veterinarians	Prescribing habits	The lack of quick diagnostic tests			never	very important	very important	moderately important	very important	slightly important	very important
1979	42	male	private institution	Doctor of Veterinary Medicine	6-15	20	yes	moderately	yes	weekly	great impact	great impact	great impact	all of the above				no	increase responsible prescribing	reduction of resistant bacteria in humans	reduction of resistant bacteria in animals	vaccines	probiotics								great impact	medium impact	great impact	medium impact	no	yes	yes	The lack of quick diagnostic tests	The lack of clear guidelines for certain diseases				rarely	very important	very important	very important	very important	very important	very important
1982	39	male	private institution	Doctor of Veterinary Medicine	6-15	80	yes	often	yes	rarely	small impact	great impact	great impact	animal products	contact with animals			no	reduction of resistant bacteria in animals	the situation will not significantly change		probiotics									great impact	great impact	medium impact	medium impact	no	yes	no	Insufficient education of veterinarians	The lack of quick diagnostic tests	The lack of clear guidelines for certain diseases			rarely	moderately important	moderately important	very important	very important	slightly important	very important
1964	57	female	private institution	Doctor of Veterinary Medicine	> 15	15	yes	moderately	yes	rarely	small impact	small impact	medium impact	contact with other people	animal products	contact with animals		yes	the situation will not significantly change			vaccines	probiotics	phytocomponents	immunostimulants	feed enzymes					great impact	medium impact	medium impact	medium impact	no	no	yes	Pressure from animal owners	Animal owners’ financial situation/cost of laboratory tests				rarely	slightly important	moderately important	very important	very important	very important	very important
1983	38	male	private institution	Doctor of Veterinary Medicine	6-15	40	no	rarely	yes	monthly	medium impact	great impact	great impact	all of the above				no	increase responsible prescribing			vaccines	probiotics	prebiotics	feed enzymes						great impact	great impact	great impact	great impact	no	yes	no	Insufficient education of veterinarians	Pressure from animal owners	Prescribing habits			rarely	not important	very important	very important	very important	slightly important	moderately important
1968	53	male	state institution	Doctor of Veterinary Medicine - specialist	6-15	100	yes	there are no good guidelines	yes	weekly	medium impact	great impact	great impact	animal products				no	increase responsible prescribing			probiotics	phage therapy	bacteriocins	phytocomponents	nanoparticles	feed enzymes				great impact	great impact	great impact	great impact	no	no	yes	Insufficient education of veterinarians	Pressure from animal owners	Prescribing habits	The lack of quick diagnostic tests		rarely	very important	very important	very important	very important	very important	moderately important
1974	47	female	private institution	Doctor of Veterinary Medicine	> 15	50	yes	moderately	yes	weekly	small impact	great impact	great impact	animal products	plants			no	reduction of resistant bacteria in humans	reduction of resistant bacteria in animals		antimicrobial peptides	bacteriocins								great impact	great impact	great impact	great impact	no	yes	yes	Insufficient education of veterinarians	Prescribing habits	The lack of quick diagnostic tests	Animal owners’ financial situation/cost of laboratory tests		rarely	slightly important	moderately important	very important	very important	very important	very important
1986	35	male	private institution	Doctor of Veterinary Medicine	6-15	250	no	often	yes	monthly	great impact	great impact	great impact	all of the above				no	increase responsible prescribing			vaccines	probiotics	synbiotics							great impact	great impact	great impact	great impact	yes	yes	yes	Insufficient education of veterinarians	The lack of quick diagnostic tests				rarely	very important	very important	moderately important	very important	slightly important	very important
1985	36	male	private institution	Masters of Veterinary Medicine	6-15	300	no	rarely	yes	rarely	small impact	great impact	great impact	animal products	plants			no	increase responsible prescribing	reduction of resistant bacteria in humans	reduction of resistant bacteria in animals	vaccines	antimicrobial peptides	bacteriocins	immunostimulants						great impact	great impact	medium impact	great impact	yes	yes	yes	Prescribing habits	The lack of quick diagnostic tests	The lack of clear guidelines for certain diseases			rarely	very important	very important	moderately important	very important	moderately important	very important
1993	28	male	private institution	Doctor of Veterinary Medicine	0 - 5	40	no	rarely	yes	rarely	medium impact	medium impact	medium impact	all of the above				no	reduction of resistant bacteria in humans	reduction of resistant bacteria in animals		vaccines	immunostimulants								great impact	medium impact	medium impact	medium impact	no	yes	no	Insufficient education of veterinarians	Pressure from animal owners	The lack of quick diagnostic tests	Animal owners’ financial situation/cost of laboratory tests		rarely	slightly important	moderately important	not important	very important	moderately important	not important
1995	26	male	private institution	Doctor of Veterinary Medicine	0 - 5	150	no	rarely	yes	rarely	great impact	medium impact	small impact	animal products				no	the situation will not significantly change			vaccines	probiotics	prebiotics							small impact	great impact	medium impact	medium impact	yes	yes	no	The lack of quick diagnostic tests	Animal owners’ financial situation/cost of laboratory tests	The lack of clear guidelines for certain diseases			often	moderately important	moderately important	moderately important	moderately important	moderately important	moderately important
1989	32	male	state institution	Doctor of Veterinary Medicine	6-15	200	no	often	yes	monthly	medium impact	great impact	great impact	contact with other people	animal products			no	reduction of resistant bacteria in humans	reduction of resistant bacteria in animals		probiotics	prebiotics								great impact	medium impact	small impact	medium impact	no	yes	no	Pressure from animal owners	Animal owners’ financial situation/cost of laboratory tests				rarely	very important	very important	slightly important	very important	moderately important	slightly important
1987	34	male	private institution	Masters of Veterinary Medicine	6-15	50	yes	moderately	yes	rarely	small impact	great impact	medium impact	animal products				no	reduction of resistant bacteria in humans			vaccines	probiotics	bacteriocins							great impact	medium impact	great impact	medium impact	no	no	yes	Prescribing habits	The lack of quick diagnostic tests	The lack of clear guidelines for certain diseases			often	moderately important	moderately important	moderately important	moderately important	moderately important	moderately important
1993	28	male	private institution	Doctor of Veterinary Medicine - specialist	0 - 5	190	yes	there are no good guidelines	yes	rarely	small impact	medium impact	medium impact	all of the above				yes	increase responsible prescribing	reduction of resistant bacteria in humans	reduction of resistant bacteria in animals	vaccines	probiotics	prebiotics	synbiotics	antimicrobial peptides					great impact	great impact	medium impact	great impact	no	yes	yes	Pressure from animal owners	The lack of quick diagnostic tests	Animal owners’ financial situation/cost of laboratory tests			moderately	very important	very important	moderately important	very important	very important	moderately important
1984	37	male	private institution	Doctor of Veterinary Medicine - specialist	6-15	300	yes	moderately	yes	monthly	medium impact	medium impact	medium impact	animal products				no	increase responsible prescribing			vaccines	probiotics	prebiotics	feed enzymes						great impact	medium impact	great impact	great impact	no	yes	no	Insufficient education of veterinarians	Pressure from animal owners	Prescribing habits	The lack of clear guidelines for certain diseases		rarely	moderately important	moderately important	moderately important	moderately important	moderately important	moderately important
1989	32	female	private institution	Masters of Veterinary Medicine	0 - 5	300	yes	moderately	yes	monthly	great impact	great impact	great impact	animal products				no	increase responsible prescribing	reduction of resistant bacteria in humans	reduction of resistant bacteria in animals	vaccines	probiotics								great impact	medium impact	great impact	medium impact	no	yes	no	Prescribing habits	Animal owners’ financial situation/cost of laboratory tests				never	very important	very important	very important	very important	moderately important	very important
1990	31	female	private institution	Doctor of Veterinary Medicine	0 - 5	20	no	often	yes	weekly	great impact	medium impact	great impact	animal products				no	increase responsible prescribing	reduction of resistant bacteria in humans	reduction of resistant bacteria in animals	vaccines	probiotics								great impact	medium impact	great impact	medium impact	no	yes	yes	Animal owners’ financial situation/cost of laboratory tests					moderately	very important	very important	very important	very important	very important	very important
1984	37	male	private institution	Doctor of Veterinary Medicine	6-15	300	no	there are no good guidelines	yes	weekly	medium impact	great impact	great impact	animal products	contact with animals			no	increase responsible prescribing			vaccines	probiotics								great impact	great impact	great impact	great impact	no	yes	yes	Pressure from animal owners	The lack of quick diagnostic tests	Animal owners’ financial situation/cost of laboratory tests			moderately	very important	moderately important	moderately important	moderately important	very important	very important
1985	36	male	private institution	Doctor of Veterinary Medicine	6-15	40	yes	rarely	yes	rarely	great impact	great impact	great impact	animal products				yes	increase responsible prescribing	reduction of resistant bacteria in humans	reduction of resistant bacteria in animals	vaccines	probiotics	prebiotics	synbiotics	antimicrobial peptides	immunostimulants	feed enzymes			great impact	great impact	great impact	great impact	no	yes	yes	Insufficient education of veterinarians					never	very important	very important	very important	very important	very important	very important
1968	53	male	state institution	Doctor of Medical Sciences – Veterinary Medicine	> 15	150	yes	often	yes	monthly	medium impact	great impact	great impact	all of the above				no	reduction of resistant bacteria in humans	reduction of resistant bacteria in animals		vaccines	probiotics	prebiotics							great impact	great impact	medium impact	medium impact	no	yes	no	Insufficient education of veterinarians	Prescribing habits	The lack of quick diagnostic tests	Animal owners’ financial situation/cost of laboratory tests	The lack of clear guidelines for certain diseases	often	moderately important	moderately important	very important	very important	moderately important	very important
1983	38	male	private institution	Doctor of Veterinary Medicine	6-15	200	no	moderately	yes	daily	medium impact	great impact	great impact	contact with other people	animal products	contact with animals		no	increase responsible prescribing	reduction of resistant bacteria in humans	reduction of resistant bacteria in animals	vaccines	probiotics	prebiotics							great impact	great impact	great impact	great impact	no	yes	no	Prescribing habits	The lack of quick diagnostic tests	The lack of clear guidelines for certain diseases			moderately	slightly important	very important	very important	very important	very important	very important
1978	43	male	private institution	Doctor of Veterinary Medicine	6-15	10	no	rarely	no	rarely	great impact	small impact	medium impact	contact with animals				no	the situation will not significantly change			probiotics	prebiotics	synbiotics	antimicrobial peptides	phage therapy	bacteriocins				great impact	medium impact	medium impact	medium impact	no	no	yes	The lack of quick diagnostic tests	Animal owners’ financial situation/cost of laboratory tests				rarely	moderately important	moderately important	slightly important	slightly important	slightly important	very important
1989	32	male	private institution	Doctor of Veterinary Medicine	0 - 5	50	no	moderately	yes	rarely	small impact	great impact	no impact	animal products	contact with animals			no	reduction of resistant bacteria in animals			vaccines	probiotics	prebiotics	immunostimulants						great impact	great impact	great impact	great impact	no	yes	no	Insufficient education of veterinarians	The lack of quick diagnostic tests	Animal owners’ financial situation/cost of laboratory tests			moderately	slightly important	moderately important	very important	very important	very important	very important
1959	62	male	private institution	Doctor of Veterinary Medicine	> 15	100	yes	rarely	yes	monthly	small impact	medium impact	medium impact	animal products				no	the situation will not significantly change			vaccines	probiotics	prebiotics							great impact	medium impact	great impact	great impact	no	yes	yes	Pressure from animal owners	Prescribing habits	The lack of quick diagnostic tests	Animal owners’ financial situation/cost of laboratory tests		rarely	moderately important	very important	very important	very important	slightly important	very important
1981	40	male	private institution	Doctor of Veterinary Medicine	6-15	50	yes	often	yes	weekly	great impact	great impact	great impact	animal products				no	the situation will not significantly change			vaccines	probiotics	prebiotics	synbiotics	antimicrobial peptides	immunostimulants	feed enzymes			great impact	great impact	great impact	great impact	no	yes	yes	Animal owners’ financial situation/cost of laboratory tests					often	very important	very important	very important	very important	very important	very important
1977	44	male	private institution	Doctor of Veterinary Medicine	> 15	300	yes	moderately	yes	rarely	great impact	great impact	great impact	contact with other people	animal products	contact with animals		no	increase responsible prescribing			prebiotics	synbiotics	phytocomponents	immunostimulants	feed enzymes					great impact	great impact	medium impact	medium impact	no	yes	no	Pressure from animal owners	Animal owners’ financial situation/cost of laboratory tests	The lack of clear guidelines for certain diseases			rarely	very important	very important	moderately important	moderately important	slightly important	very important
1984	37	male	private institution	Masters of Veterinary Medicine	6-15	100	yes	often	yes	weekly	great impact	great impact	great impact	all of the above				no	increase responsible prescribing	reduction of resistant bacteria in humans	reduction of resistant bacteria in animals	vaccines	probiotics	prebiotics	synbiotics	antimicrobial peptides	bacteriocins	phytocomponents	feed enzymes		great impact	great impact	great impact	great impact	no	no	yes	The lack of quick diagnostic tests	Animal owners’ financial situation/cost of laboratory tests	The lack of clear guidelines for certain diseases			never	very important	very important	very important	very important	very important	very important
1981	40	male	private institution	Doctor of Veterinary Medicine	6-15	100	yes	rarely	no	monthly	great impact	medium impact	great impact	contact with other people	contact with animals			no	the situation will not significantly change			vaccines	probiotics	prebiotics	immunostimulants	feed enzymes					great impact	medium impact	small impact	medium impact	yes	yes	yes	The lack of clear guidelines for certain diseases					never	slightly important	moderately important	moderately important	very important	moderately important	slightly important
1964	57	male	state institution	Doctor of Veterinary Medicine	> 15	100	yes	often	yes	rarely	medium impact	great impact	great impact	animal products				no	increase responsible prescribing	reduction of resistant bacteria in humans	reduction of resistant bacteria in animals	antimicrobial peptides									great impact	medium impact	great impact	great impact	yes	yes	yes	The lack of clear guidelines for certain diseases					rarely	moderately important	very important	very important	very important	moderately important	moderately important
1990	31	male	private institution	Doctor of Veterinary Medicine	6-15	50	yes	moderately	yes	rarely	medium impact	great impact	great impact	animal products	contact with animals			no	increase responsible prescribing	reduction of resistant bacteria in humans	reduction of resistant bacteria in animals	vaccines	probiotics	prebiotics	antimicrobial peptides	immunostimulants	nanoparticles	feed enzymes			great impact	great impact	great impact	great impact	no	yes	yes	Pressure from animal owners	Prescribing habits	The lack of quick diagnostic tests	Animal owners’ financial situation/cost of laboratory tests		often	moderately important	moderately important	slightly important	very important	moderately important	very important
1991	30	female	private institution	Masters of Veterinary Medicine	0 - 5	1	no	never	no	never	no impact	no impact	no impact	plants				no	the situation will not significantly change			nanoparticles									small impact	small impact	small impact	small impact	no	no	no	Prescribing habits					often	not important	not important	not important	not important	not important	not important
1991	30	male	private institution	Doctor of Veterinary Medicine	0 - 5	1000	yes	moderately	yes	monthly	great impact	great impact	great impact	animal products	contact with animals			no	reduction of resistant bacteria in animals			vaccines	probiotics	prebiotics	phytocomponents	feed enzymes					great impact	medium impact	great impact	medium impact	no	yes	yes	Pressure from animal owners	The lack of clear guidelines for certain diseases				moderately	moderately important	moderately important	very important	very important	very important	very important
1984	37	male	private institution	Doctor of Veterinary Medicine	6-15	270	no	moderately	yes	rarely	great impact	great impact	great impact	all of the above				yes	increase responsible prescribing	reduction of resistant bacteria in humans		vaccines	probiotics	prebiotics	synbiotics	phage therapy	phytocomponents	immunostimulants	nanoparticles	feed enzymes	great impact	great impact	great impact	great impact	yes	yes	no	Insufficient education of veterinarians					never	very important	very important	very important	very important	slightly important	very important
1984	37	male	private institution	Doctor of Veterinary Medicine	6-15	100	yes	often	yes	monthly	small impact	medium impact	medium impact	contact with other people	contact with animals	environment		no	increase responsible prescribing	reduction of resistant bacteria in humans	reduction of resistant bacteria in animals	vaccines	probiotics	prebiotics	phytocomponents	immunostimulants	feed enzymes				great impact	small impact	great impact	medium impact	no	yes	yes	Insufficient education of veterinarians	Prescribing habits	The lack of quick diagnostic tests			moderately	moderately important	moderately important	slightly important	slightly important	moderately important	very important
1983	38	male	private institution	Doctor of Veterinary Medicine	6-15	100	no	moderately	yes	weekly	medium impact	medium impact	medium impact	animal products	contact with animals			yes	increase responsible prescribing	reduction of resistant bacteria in humans	reduction of resistant bacteria in animals	probiotics	prebiotics	antimicrobial peptides	immunostimulants	feed enzymes					great impact	medium impact	great impact	medium impact	no	yes	yes	The lack of quick diagnostic tests	Animal owners’ financial situation/cost of laboratory tests	The lack of clear guidelines for certain diseases			moderately	very important	very important	moderately important	very important	very important	very important
1986	35	male	private institution	Doctor of Veterinary Medicine	6-15	100	yes	moderately	yes	weekly	great impact	medium impact	medium impact	animal products				no	increase responsible prescribing	reduction of resistant bacteria in animals		vaccines	probiotics	prebiotics	immunostimulants						great impact	medium impact	great impact	great impact	no	yes	yes	Pressure from animal owners	The lack of quick diagnostic tests	Animal owners’ financial situation/cost of laboratory tests			moderately	moderately important	slightly important	slightly important	slightly important	moderately important	slightly important
1985	36	male	private institution	Doctor of Veterinary Medicine	6-15	300	yes	rarely	yes	weekly	great impact	medium impact	medium impact	animal products	environment			no	increase responsible prescribing			vaccines	probiotics	prebiotics	feed enzymes						great impact	great impact	great impact	great impact	no	yes	yes	Prescribing habits	The lack of quick diagnostic tests				never	very important	moderately important	moderately important	very important	slightly important	not important
1960	61	male	private institution	Doctor of Veterinary Medicine	> 15	50	no	rarely	I do not know	weekly	medium impact	medium impact	medium impact	all of the above				no	the situation will not significantly change			vaccines									great impact	small impact	great impact	medium impact	no	yes	yes	Pressure from animal owners					never	very important	moderately important	slightly important	very important	slightly important	very important
1989	32	male	state institution	Doctor of Veterinary Medicine	6-15	120	yes	often	yes	weekly	small impact	great impact	great impact	animal products				no	the situation will not significantly change			probiotics	prebiotics	synbiotics	phytocomponents	feed enzymes					great impact	great impact	great impact	great impact	yes	yes	yes	Pressure from animal owners	Prescribing habits	The lack of clear guidelines for certain diseases			rarely	moderately important	moderately important	moderately important	moderately important	moderately important	very important
1963	58	male	state institution	Masters of Veterinary Medicine	> 15	40	no	often	yes	rarely	medium impact	medium impact	medium impact	all of the above				no	reduction of resistant bacteria in humans			vaccines									great impact	medium impact	small impact	great impact	no	yes	yes	Prescribing habits					rarely	very important	slightly important	slightly important	slightly important	very important	slightly important
1968	53	female	state institution	Doctor of Veterinary Medicine - specialist	> 15	2	yes	moderately	yes	rarely	great impact	great impact	great impact	animal products	contact with animals	environment		yes	increase responsible prescribing	reduction of resistant bacteria in animals		antimicrobial peptides	phage therapy	bacteriocins							great impact	great impact	great impact	great impact	yes	yes	yes	Pressure from animal owners	Animal owners’ financial situation/cost of laboratory tests				never	very important	very important	very important	very important	very important	very important
1972	49	male	private institution	Doctor of Veterinary Medicine	> 15	150	no	moderately	yes	rarely	no impact	great impact	great impact	all of the above				no	the situation will not significantly change			vaccines	probiotics	prebiotics	synbiotics						great impact	medium impact	great impact	medium impact	no	no	no	Pressure from animal owners	Prescribing habits	The lack of quick diagnostic tests	Animal owners’ financial situation/cost of laboratory tests		moderately	very important	very important	moderately important	moderately important	slightly important	moderately important
1985	36	male	private institution	Doctor of Veterinary Medicine	6-15	100	no	never	yes	monthly	medium impact	great impact	great impact	all of the above				no	the situation will not significantly change			vaccines	probiotics	prebiotics	synbiotics	feed enzymes					great impact	great impact	great impact	great impact	no	yes	yes	Pressure from animal owners	The lack of quick diagnostic tests	Animal owners’ financial situation/cost of laboratory tests	The lack of clear guidelines for certain diseases		rarely	slightly important	slightly important	not important	not important	not important	moderately important
1984	37	male	private institution	Doctor of Veterinary Medicine	6-15	500	yes	moderately	yes	monthly	no impact	no impact	no impact	contact with other people	animal products	contact with animals		no	increase responsible prescribing			vaccines	probiotics	prebiotics	immunostimulants	feed enzymes					great impact	great impact	great impact	great impact	no	yes	yes	Prescribing habits	The lack of quick diagnostic tests	The lack of clear guidelines for certain diseases			rarely	very important	very important	moderately important	moderately important	slightly important	moderately important
1979	42	male	private institution	Doctor of Veterinary Medicine - specialist	6-15	300	yes	often	I do not know	weekly	small impact	great impact	great impact	animal products	plants			yes	increase responsible prescribing	reduction of resistant bacteria in humans	reduction of resistant bacteria in animals	vaccines	probiotics	prebiotics	immunostimulants	feed enzymes					great impact	great impact	medium impact	small impact	no	yes	no	Prescribing habits	Animal owners’ financial situation/cost of laboratory tests				never	very important	moderately important	not important	moderately important	not important	slightly important
1981	40	male	state institution	Doctor of Veterinary Medicine	6-15	8	yes	rarely	yes	monthly	great impact	great impact	great impact	animal products	contact with animals			no	reduction of resistant bacteria in animals			vaccines	probiotics	prebiotics	antimicrobial peptides	bacteriocins	feed enzymes				great impact	great impact	great impact	great impact	no	yes	yes	Pressure from animal owners	Prescribing habits	The lack of quick diagnostic tests	Animal owners’ financial situation/cost of laboratory tests		moderately	slightly important	moderately important	very important	moderately important	moderately important	very important
1967	54	male	private institution	Doctor of Veterinary Medicine	> 15	100	I do not remember	moderately	yes	monthly	small impact	medium impact	medium impact	animal products	plants			yes	reduction of resistant bacteria in humans	reduction of resistant bacteria in animals		vaccines	probiotics	immunostimulants							great impact	medium impact	great impact	great impact	no	yes	yes	The lack of clear guidelines for certain diseases					never	very important	very important	very important	very important	very important	moderately important
1990	31	male	private institution	Doctor of Veterinary Medicine	0 - 5	100	no	moderately	yes	weekly	great impact	no impact	great impact	contact with other people	animal products	contact with animals		no	increase responsible prescribing			probiotics	prebiotics	synbiotics	bacteriocins						great impact	great impact	great impact	great impact	no	yes	yes	The lack of quick diagnostic tests					never	very important	very important	very important	very important	not important	very important
1982	39	male	state institution	Doctor of Medical Sciences – Veterinary Medicine	6-15	200	yes	never	yes	weekly	great impact	great impact	great impact	contact with other people	animal products	contact with animals		yes	increase responsible prescribing	reduction of resistant bacteria in humans	reduction of resistant bacteria in animals	probiotics	prebiotics	synbiotics	antimicrobial peptides	phytocomponents					great impact	medium impact	great impact	great impact	no	yes	yes	The lack of quick diagnostic tests	Animal owners’ financial situation/cost of laboratory tests	The lack of clear guidelines for certain diseases			rarely	moderately important	very important	moderately important	very important	very important	very important
1968	53	female	state institution	Doctor of Veterinary Medicine - specialist	> 15	2	yes	moderately	yes	rarely	great impact	great impact	great impact	animal products	contact with animals	environment		yes	increase responsible prescribing	reduction of resistant bacteria in animals		antimicrobial peptides	phage therapy	bacteriocins							great impact	great impact	great impact	great impact	yes	yes	yes	Pressure from animal owners	Animal owners’ financial situation/cost of laboratory tests				never	very important	very important	very important	very important	very important	very important
1987	34	female	private institution	Doctor of Veterinary Medicine	6-15	150	no	never	no	rarely	medium impact	small impact	small impact	contact with animals	environment			yes	increase responsible prescribing			phytocomponents	immunostimulants								great impact	medium impact	great impact	great impact	no	no	no	The lack of quick diagnostic tests	Animal owners’ financial situation/cost of laboratory tests				never	very important	very important	very important	very important	very important	moderately important
1982	39	male	state institution	Doctor of Medical Sciences – Veterinary Medicine	> 15	300	yes	rarely	yes	monthly	great impact	medium impact	great impact	all of the above				no	the situation will not significantly change			vaccines	probiotics	prebiotics							great impact	great impact	great impact	great impact	no	yes	no	Insufficient education of veterinarians	Pressure from animal owners	Prescribing habits			often	not important	not important	slightly important	very important	very important	not important
1991	30	male	private institution	Doctor of Veterinary Medicine	6-15	100	no	often	yes	weekly	great impact	great impact	great impact	animal products				yes	increase responsible prescribing			probiotics	prebiotics	feed enzymes							great impact	great impact	great impact	great impact	yes	yes	yes	Pressure from animal owners					rarely	moderately important	very important	moderately important	moderately important	moderately important	very important
1991	30	female	private institution	Doctor of Veterinary Medicine	0 - 5	20	yes	rarely	yes	monthly	medium impact	great impact	great impact	animal products	contact with animals			no	reduction of resistant bacteria in humans			antimicrobial peptides	bacteriocins								great impact	medium impact	great impact	great impact	no	yes	yes	Insufficient education of veterinarians	Pressure from animal owners	Animal owners’ financial situation/cost of laboratory tests			rarely	slightly important	very important	very important	moderately important	very important	very important
1993	28	female	private institution	Doctor of Veterinary Medicine	0 - 5	150	yes	rarely	yes	monthly	great impact	great impact	great impact	all of the above				yes	increase responsible prescribing	reduction of resistant bacteria in humans	reduction of resistant bacteria in animals	vaccines	probiotics	prebiotics	antimicrobial peptides						great impact	medium impact	great impact	great impact	no	yes	yes	Insufficient education of veterinarians	Pressure from animal owners	Animal owners’ financial situation/cost of laboratory tests	The lack of clear guidelines for certain diseases		often	very important	very important	very important	very important	moderately important	very important
1992	29	male	state institution	Doctor of Veterinary Medicine	0 - 5	10	yes	rarely	yes	monthly	medium impact	medium impact	small impact	all of the above				yes	reduction of resistant bacteria in humans			vaccines	probiotics	prebiotics	antimicrobial peptides	feed enzymes					great impact	medium impact	medium impact	small impact	yes	no	yes	The lack of clear guidelines for certain diseases					often	moderately important	moderately important	slightly important	slightly important	moderately important	moderately important
1973	48	male	private institution	Doctor of Medical Sciences – Veterinary Medicine	6-15	200	yes	often	yes	rarely	great impact	great impact	great impact	contact with other people	animal products	plants	environment	no	increase responsible prescribing	reduction of resistant bacteria in humans	reduction of resistant bacteria in animals	vaccines	probiotics	prebiotics	phytocomponents	immunostimulants	feed enzymes				great impact	great impact	medium impact	medium impact	no	yes	yes	Insufficient education of veterinarians	Pressure from animal owners	Prescribing habits	The lack of quick diagnostic tests		rarely	very important	very important	very important	very important	very important	moderately important
1982	39	male	state institution	Doctor of Veterinary Medicine - specialist	6-15	300	yes	moderately	yes	weekly	small impact	great impact	great impact	animal products				no	increase responsible prescribing			vaccines	probiotics	prebiotics	synbiotics	immunostimulants	feed enzymes				great impact	great impact	great impact	great impact	no	yes	yes	Pressure from animal owners	The lack of quick diagnostic tests	Animal owners’ financial situation/cost of laboratory tests			often	slightly important	slightly important	slightly important	moderately important	very important	moderately important
1977	44	male	private institution	Doctor of Medical Sciences – Veterinary Medicine	> 15	500	yes	often	yes	monthly	small impact	great impact	great impact	animal products				no	increase responsible prescribing	reduction of resistant bacteria in animals		vaccines	probiotics	bacteriocins	immunostimulants	feed enzymes					great impact	great impact	medium impact	great impact	no	yes	yes	The lack of clear guidelines for certain diseases					rarely	very important	very important	moderately important	moderately important	moderately important	very important
1982	39	male	state institution	Doctor of Medical Sciences – Veterinary Medicine	6-15	1000	yes	often	yes	rarely	medium impact	great impact	great impact	animal products	plants			no	the situation will not significantly change			vaccines	probiotics	prebiotics	immunostimulants	feed enzymes					great impact	great impact	medium impact	medium impact	no	yes	yes	Pressure from animal owners	Prescribing habits	Animal owners’ financial situation/cost of laboratory tests	The lack of clear guidelines for certain diseases		moderately	not important	slightly important	moderately important	very important	moderately important	not important
1988	33	male	private institution	Doctor of Veterinary Medicine	6-15	150	no	moderately	yes	rarely	great impact	medium impact	great impact	animal products				no	reduction of resistant bacteria in humans			vaccines									great impact	great impact	small impact	medium impact	no	yes	yes	The lack of quick diagnostic tests	Animal owners’ financial situation/cost of laboratory tests				moderately	moderately important	moderately important	very important	very important	very important	very important
1987	34	male	state institution	Doctor of Medical Sciences – Veterinary Medicine	6-15	30	yes	moderately	yes	daily	great impact	great impact	great impact	all of the above				yes	increase responsible prescribing	reduction of resistant bacteria in humans	reduction of resistant bacteria in animals	probiotics	prebiotics	synbiotics	phage therapy	bacteriocins	phytocomponents	immunostimulants	feed enzymes		great impact	great impact	great impact	great impact	no	yes	no	Insufficient education of veterinarians	Pressure from animal owners	The lack of quick diagnostic tests	Animal owners’ financial situation/cost of laboratory tests		rarely	moderately important	very important	very important	very important	very important	very important
1970	51	male	private institution	Doctor of Veterinary Medicine	> 15	100	yes	often	yes	monthly	no impact	great impact	great impact	animal products				yes	increase responsible prescribing			vaccines	probiotics	prebiotics	bacteriocins	immunostimulants					great impact	great impact	great impact	great impact	yes	yes	yes	Prescribing habits					never	very important	very important	very important	very important	very important	very important
1973	48	female	state institution	Doctor of Medical Sciences – Veterinary Medicine	> 15	250	yes	often	no	rarely	great impact	great impact	great impact	contact with other people	contact with animals			yes	increase responsible prescribing	reduction of resistant bacteria in humans	reduction of resistant bacteria in animals	phage therapy	immunostimulants	feed enzymes							medium impact	medium impact	great impact	great impact	no	no	yes	Pressure from animal owners					rarely	not important	slightly important	not important	not important	not important	not important
1963	58	male	private institution	Doctor of Veterinary Medicine - specialist	> 15	50	yes	never	yes	rarely	medium impact	great impact	great impact	animal products				no	reduction of resistant bacteria in humans	reduction of resistant bacteria in animals		probiotics									great impact	medium impact	great impact	medium impact	no	yes	no	The lack of clear guidelines for certain diseases					rarely	very important	moderately important	slightly important	moderately important	very important	very important
1986	35	male	private institution	Doctor of Veterinary Medicine - specialist	6-15	30	yes	moderately	no	rarely	medium impact	great impact	great impact	animal products	contact with animals			no	the situation will not significantly change			vaccines	probiotics	immunostimulants	feed enzymes						great impact	great impact	small impact	small impact	no	no	yes	Prescribing habits	The lack of quick diagnostic tests	Animal owners’ financial situation/cost of laboratory tests			never	very important	very important	very important	moderately important	very important	slightly important
1979	42	male	private institution	Doctor of Veterinary Medicine	6-15	400	yes	often	yes	weekly	medium impact	medium impact	medium impact	animal products				yes	increase responsible prescribing			vaccines									great impact	great impact	great impact	great impact	yes	yes	yes	Animal owners’ financial situation/cost of laboratory tests					rarely	very important	very important	very important	very important	very important	very important
1967	54	male	private institution	Doctor of Veterinary Medicine	> 15	250	yes	often	yes	monthly	no impact	great impact	great impact	animal products				no	increase responsible prescribing	reduction of resistant bacteria in animals		vaccines	probiotics	antimicrobial peptides	phytocomponents	immunostimulants	feed enzymes				great impact	great impact	great impact	medium impact	no	yes	yes	Insufficient education of veterinarians	The lack of quick diagnostic tests	Animal owners’ financial situation/cost of laboratory tests			moderately	very important	very important	very important	very important	moderately important	moderately important
1988	33	male	private institution	Doctor of Veterinary Medicine	6-15	900	yes	rarely	I do not know	weekly	small impact	great impact	small impact	all of the above				no	the situation will not significantly change			vaccines	probiotics	prebiotics	antimicrobial peptides						great impact	small impact	great impact	medium impact	no	no	no	Pressure from animal owners	Animal owners’ financial situation/cost of laboratory tests				never	not important	not important	slightly important	very important	moderately important	moderately important
1976	45	male	private institution	Doctor of Veterinary Medicine	6-15	200	yes	often	yes	weekly	great impact	great impact	great impact	all of the above				yes	increase responsible prescribing	reduction of resistant bacteria in humans	reduction of resistant bacteria in animals	vaccines	probiotics	prebiotics	synbiotics	antimicrobial peptides	phage therapy	immunostimulants	nanoparticles	feed enzymes	great impact	great impact	great impact	great impact	no	yes	yes	Insufficient education of veterinarians	Pressure from animal owners	The lack of clear guidelines for certain diseases			rarely	moderately important	very important	very important	very important	very important	very important
1962	59	male	private institution	Doctor of Veterinary Medicine - specialist	> 15	60	yes	moderately	yes	rarely	great impact	medium impact	small impact	all of the above				no	the situation will not significantly change			vaccines									great impact	small impact	great impact	small impact	no	yes	yes	The lack of clear guidelines for certain diseases					never	moderately important	moderately important	moderately important	moderately important	moderately important	moderately important
1971	50	male	private institution	Doctor of Veterinary Medicine	> 15	500	yes	there are no good guidelines	yes	weekly	medium impact	medium impact	medium impact	contact with other people	animal products	contact with animals		no	increase responsible prescribing	reduction of resistant bacteria in humans	reduction of resistant bacteria in animals	vaccines	probiotics	prebiotics	bacteriocins	nanoparticles					great impact	medium impact	great impact	medium impact	no	yes	yes	Pressure from animal owners	Animal owners’ financial situation/cost of laboratory tests				rarely	very important	very important	moderately important	very important	slightly important	moderately important
1955	66	male	private institution	Doctor of Veterinary Medicine - specialist	> 15	100	yes	there are no good guidelines	yes	daily	great impact	great impact	great impact	all of the above				yes	the situation will not significantly change			vaccines	probiotics	feed enzymes							great impact	great impact	great impact	great impact	no	yes	yes	The lack of quick diagnostic tests	The lack of clear guidelines for certain diseases				never	very important	very important	very important	very important	very important	very important
1989	32	female	private institution	Doctor of Veterinary Medicine	0 - 5	130	yes	moderately	yes	monthly	great impact	great impact	great impact	animal products	contact with animals	plants		no	increase responsible prescribing	reduction of resistant bacteria in humans	reduction of resistant bacteria in animals	vaccines	probiotics	prebiotics	phytocomponents	immunostimulants					great impact	medium impact	great impact	great impact	yes	yes	yes	Insufficient education of veterinarians	Prescribing habits	The lack of quick diagnostic tests	Animal owners’ financial situation/cost of laboratory tests	The lack of clear guidelines for certain diseases	never	not important	very important	very important	very important	very important	very important
1978	43	male	private institution	Doctor of Veterinary Medicine	> 15	1000	yes	rarely	yes	rarely	small impact	great impact	small impact	animal products	plants			no	increase responsible prescribing			vaccines	probiotics	prebiotics	synbiotics	phytocomponents	immunostimulants	feed enzymes			medium impact	great impact	small impact	great impact	no	yes	yes	Prescribing habits	The lack of quick diagnostic tests	Animal owners’ financial situation/cost of laboratory tests			rarely	slightly important	moderately important	very important	very important	very important	very important
1962	59	male	private institution	Doctor of Veterinary Medicine - specialist	> 15	100	yes	rarely	I do not know	rarely	great impact	great impact	great impact	all of the above				yes	increase responsible prescribing	reduction of resistant bacteria in humans	reduction of resistant bacteria in animals	vaccines	bacteriocins								great impact	great impact	great impact	great impact	yes	yes	yes	Animal owners’ financial situation/cost of laboratory tests					rarely	very important	very important	very important	very important	very important	very important
1985	36	male	private institution	Doctor of Veterinary Medicine	6-15	150	yes	there are no good guidelines	yes	never	medium impact	medium impact	great impact	all of the above				no	increase responsible prescribing			vaccines	probiotics	synbiotics	feed enzymes						great impact	great impact	medium impact	medium impact	no	yes	no	Prescribing habits	Animal owners’ financial situation/cost of laboratory tests	The lack of clear guidelines for certain diseases			rarely	moderately important	moderately important	very important	very important	slightly important	very important
1994	27	male	state institution	Doctor of Veterinary Medicine	0 - 5	20	yes	moderately	yes	rarely	great impact	great impact	great impact	animal products				no	reduction of resistant bacteria in humans			vaccines	prebiotics	antimicrobial peptides	phytocomponents	feed enzymes					great impact	medium impact	medium impact	great impact	no	yes	no	The lack of quick diagnostic tests	Animal owners’ financial situation/cost of laboratory tests				moderately	moderately important	moderately important	moderately important	moderately important	moderately important	very important
1991	30	female	private institution	Doctor of Veterinary Medicine - specialist	0 - 5	200	no	rarely	yes	rarely	medium impact	great impact	great impact	all of the above				yes	increase responsible prescribing			probiotics	bacteriocins	phytocomponents	feed enzymes						great impact	great impact	great impact	great impact	no	yes	no	Insufficient education of veterinarians	Pressure from animal owners	Animal owners’ financial situation/cost of laboratory tests			rarely	slightly important	slightly important	moderately important	very important	very important	very important
1981	40	male	private institution	Doctor of Veterinary Medicine	6-15	2000	no	never	I do not know	weekly	great impact	great impact	great impact	animal products	contact with animals			yes	the situation will not significantly change			vaccines	probiotics	prebiotics	synbiotics	antimicrobial peptides	feed enzymes				great impact	great impact	great impact	great impact	no	yes	yes	Insufficient education of veterinarians	Pressure from animal owners	Animal owners’ financial situation/cost of laboratory tests			never	not important	not important	very important	very important	very important	not important
1969	52	male	private institution	Doctor of Veterinary Medicine	> 15	30	yes	rarely	yes	rarely	medium impact	great impact	great impact	animal products				no	increase responsible prescribing	reduction of resistant bacteria in humans		probiotics	prebiotics	phage therapy	immunostimulants						great impact	medium impact	great impact	medium impact	no	yes	yes	The lack of quick diagnostic tests	Animal owners’ financial situation/cost of laboratory tests				rarely	very important	very important	very important	very important	moderately important	very important
1965	56	male	state institution	Doctor of Medical Sciences – Veterinary Medicine	> 15	30	yes	often	yes	rarely	small impact	great impact	great impact	animal products	contact with animals			yes	increase responsible prescribing	reduction of resistant bacteria in humans	reduction of resistant bacteria in animals	probiotics	prebiotics	immunostimulants							great impact	great impact	great impact	great impact	yes	yes	yes	Insufficient education of veterinarians	The lack of quick diagnostic tests	Animal owners’ financial situation/cost of laboratory tests			rarely	very important	very important	very important	very important	moderately important	very important
1972	49	male	private institution	Doctor of Veterinary Medicine	> 15	50	no	often	yes	rarely	medium impact	great impact	great impact	animal products				no	increase responsible prescribing	reduction of resistant bacteria in humans		vaccines	probiotics	prebiotics	immunostimulants						medium impact	great impact	great impact	medium impact	no	yes	yes	The lack of quick diagnostic tests					rarely	very important	very important	very important	very important	moderately important	slightly important
1979	42	male	private institution	Doctor of Veterinary Medicine	6-15	100	yes	moderately	yes	rarely	small impact	great impact	great impact	contact with other people	contact with animals			no	increase responsible prescribing	reduction of resistant bacteria in humans	reduction of resistant bacteria in animals	vaccines	probiotics	prebiotics	phytocomponents						great impact	great impact	great impact	great impact	no	yes	yes	The lack of quick diagnostic tests					moderately	very important	very important	very important	very important	moderately important	very important
1964	57	male	private institution	Doctor of Veterinary Medicine	> 15	30	yes	moderately	yes	monthly	medium impact	small impact	small impact	animal products				no	increase responsible prescribing			vaccines	probiotics								great impact	great impact	small impact	medium impact	no	yes	yes	Pressure from animal owners	The lack of quick diagnostic tests	Animal owners’ financial situation/cost of laboratory tests	The lack of clear guidelines for certain diseases		rarely	moderately important	moderately important	very important	moderately important	very important	very important
1979	42	male	private institution	Doctor of Veterinary Medicine	> 15	100	yes	rarely	yes	monthly	great impact	great impact	great impact	contact with other people	animal products	all of the above		no	increase responsible prescribing	reduction of resistant bacteria in humans	reduction of resistant bacteria in animals	vaccines	probiotics	nanoparticles							great impact	great impact	great impact	great impact	no	yes	no	Insufficient education of veterinarians	Pressure from animal owners	The lack of quick diagnostic tests	Animal owners’ financial situation/cost of laboratory tests	The lack of clear guidelines for certain diseases	moderately	very important	very important	moderately important	very important	very important	very important
1966	55	male	private institution	Doctor of Veterinary Medicine	> 15	100	yes	moderately	yes	rarely	medium impact	great impact	great impact	animal products	contact with animals	environment		no	reduction of resistant bacteria in humans	reduction of resistant bacteria in animals		probiotics	prebiotics	synbiotics	bacteriocins	immunostimulants					great impact	great impact	medium impact	great impact	no	yes	yes	Pressure from animal owners	The lack of quick diagnostic tests	Animal owners’ financial situation/cost of laboratory tests			rarely	very important	very important	very important	very important	very important	very important
1983	38	male	state institution	Doctor of Veterinary Medicine	6-15	150	yes	moderately	yes	rarely	great impact	great impact	great impact	all of the above				no	reduction of resistant bacteria in animals			vaccines	probiotics	prebiotics	immunostimulants	feed enzymes					great impact	great impact	great impact	great impact	no	yes	yes	Pressure from animal owners	The lack of quick diagnostic tests	Animal owners’ financial situation/cost of laboratory tests			moderately	moderately important	moderately important	very important	very important	moderately important	very important
1979	42	male	state institution	Doctor of Medical Sciences – Veterinary Medicine	6-15	50	yes	often	yes	weekly	medium impact	great impact	great impact	all of the above				no	increase responsible prescribing			prebiotics	bacteriocins								great impact	great impact	great impact	great impact	no	yes	no	Pressure from animal owners	Animal owners’ financial situation/cost of laboratory tests				never	very important	very important	moderately important	very important	very important	very important
1968	53	male	private institution	Doctor of Veterinary Medicine	> 15	50	yes	moderately	yes	monthly	small impact	great impact	great impact	contact with other people	animal products	contact with animals		no	the situation will not significantly change			vaccines	probiotics	prebiotics	synbiotics	immunostimulants					great impact	great impact	great impact	great impact	no	yes	yes	Insufficient education of veterinarians	Prescribing habits	The lack of quick diagnostic tests	Animal owners’ financial situation/cost of laboratory tests		rarely	very important	very important	very important	very important	moderately important	very important
1963	58	male	private institution	Doctor of Veterinary Medicine	> 15	100	yes	moderately	I do not know	weekly	great impact	great impact	great impact	all of the above				no	reduction of resistant bacteria in animals			vaccines	probiotics								great impact	great impact	great impact	great impact	no	yes	yes	Prescribing habits	The lack of quick diagnostic tests	Animal owners’ financial situation/cost of laboratory tests			moderately	very important	very important	very important	very important	very important	very important
1982	39	female	private institution	Doctor of Veterinary Medicine	6-15	500	yes	often	yes	monthly	great impact	great impact	great impact	all of the above				yes	increase responsible prescribing	reduction of resistant bacteria in humans		vaccines	probiotics	prebiotics	phytocomponents	feed enzymes					great impact	great impact	great impact	great impact	yes	yes	yes	Pressure from animal owners	The lack of quick diagnostic tests	Animal owners’ financial situation/cost of laboratory tests			rarely	very important	very important	moderately important	very important	very important	very important
1988	33	male	private institution	Doctor of Veterinary Medicine	0 - 5	50	no	rarely	yes	monthly	great impact	small impact	no impact	all of the above				no	increase responsible prescribing			probiotics									medium impact	medium impact	great impact	small impact	no	yes	no	Insufficient education of veterinarians					often	very important	very important	not important	moderately important	not important	very important
1981	40	female	private institution	Doctor of Veterinary Medicine	6-15	100	no	there are no good guidelines	yes	weekly	small impact	medium impact	great impact	animal products	contact with animals	environment		no	increase responsible prescribing	reduction of resistant bacteria in animals		vaccines	probiotics								great impact	great impact	medium impact	great impact	no	yes	yes	The lack of quick diagnostic tests	Animal owners’ financial situation/cost of laboratory tests				rarely	moderately important	moderately important	very important	very important	very important	slightly important
1986	35	male	private institution	Doctor of Veterinary Medicine	6-15	90	yes	often	yes	rarely	small impact	great impact	great impact	animal products				no	increase responsible prescribing			vaccines									great impact	great impact	great impact	great impact	no	yes	no	The lack of quick diagnostic tests	Animal owners’ financial situation/cost of laboratory tests				moderately	very important	very important	moderately important	slightly important	very important	very important
1984	37	male	private institution	Doctor of Veterinary Medicine	6-15	95	yes	moderately	yes	rarely	great impact	great impact	great impact	animal products				yes	increase responsible prescribing			vaccines	probiotics	prebiotics	synbiotics	phytocomponents	feed enzymes				great impact	great impact	great impact	great impact	yes	yes	yes	Insufficient education of veterinarians	The lack of quick diagnostic tests				rarely	very important	very important	moderately important	moderately important	slightly important	very important
1973	48	female	private institution	Doctor of Veterinary Medicine	> 15	126	yes	moderately	yes	rarely	great impact	medium impact	small impact	contact with other people	animal products	contact with animals	environment	no	the situation will not significantly change			vaccines	probiotics								medium impact	small impact	medium impact	medium impact	no	no	yes	Prescribing habits	Animal owners’ financial situation/cost of laboratory tests	The lack of clear guidelines for certain diseases			moderately	moderately important	moderately important	moderately important	moderately important	moderately important	moderately important
1982	39	male	state institution	Doctor of Veterinary Medicine	6-15	100	yes	rarely	no	monthly	small impact	great impact	great impact	contact with other people	environment			no	reduction of resistant bacteria in animals			vaccines	probiotics	immunostimulants	feed enzymes						great impact	great impact	medium impact	great impact	yes	yes	yes	Prescribing habits	The lack of quick diagnostic tests	Animal owners’ financial situation/cost of laboratory tests			moderately	moderately important	moderately important	very important	very important	moderately important	very important
1979	42	male	private institution	Doctor of Veterinary Medicine	6-15	100	no	moderately	yes	daily	great impact	great impact	great impact	all of the above				no	increase responsible prescribing	reduction of resistant bacteria in humans	reduction of resistant bacteria in animals	vaccines	probiotics	prebiotics							great impact	medium impact	great impact	great impact	no	yes	yes	Pressure from animal owners	Prescribing habits	The lack of quick diagnostic tests	Animal owners’ financial situation/cost of laboratory tests		moderately	slightly important	slightly important	very important	very important	very important	slightly important
[truncated: 25 more columns]
